# Supplementary material
Source: publisher figshare collection journal article supplement (https://acs.figshare.com/ndownloader/files/4033621)
Supplement: Supplementary file 1 [file 4033621]

## Supporting Information

### Vertically Aligned Gold Nanorod Monolayer on Arbitrary Substrates: Self Assembly and Femtomolar Detection of Food Contaminants

Bo Peng,<sup>†</sup> Guangyuan Li,<sup>†</sup> Dehui Li,<sup>†</sup> Stephanie Dodson,<sup>†</sup> Qing Zhang,<sup>†</sup> Jun Zhang,<sup>†</sup> Yih Hong Lee,<sup>£</sup> Hilmi Volkan Demir,<sup>†, §</sup> Xing Yi Ling,<sup>£</sup> and Qihua Xiong<sup>†, §, \*</sup>

<sup>†</sup>Division of Physics and Applied Physics, School of Physical and Mathematical Sciences, Nanyang Technological University, Singapore 637371

<sup>§</sup>Division of Microelectronics, School of Electrical and Electronic Engineering, Nanyang Technological University, Singapore 639798

<sup>£</sup>Chemistry and Biological Chemistry Division, School of Physical and Mathematical Sciences, Nanyang Technological University, Singapore 637371

\* To whom correspondence should be addressed. Email address: [Qihua@ntu.edu.sg](mailto:Qihua@ntu.edu.sg).

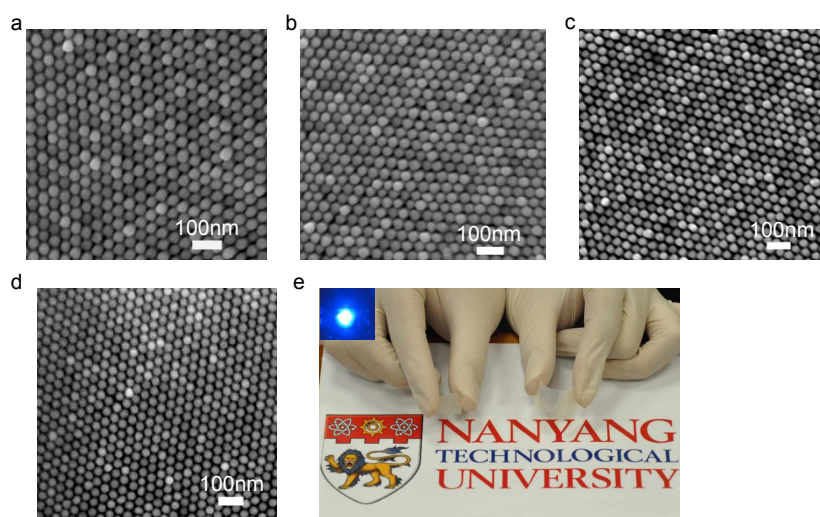

**Supplementary Figure S1** SEM images of vertically aligned Au nanorod monolayer on different substrates: (a) GaN LED, (b) ITO glass, (c) glass, (d) flexible PEN polymer films. (e) A picture of our arrays on flexible PEN films and GaN LED device taken with a background of NTU campus magazine to demonstrate the flexibility. The inset is the picture of the GaN LED device at 3.5 mA current.

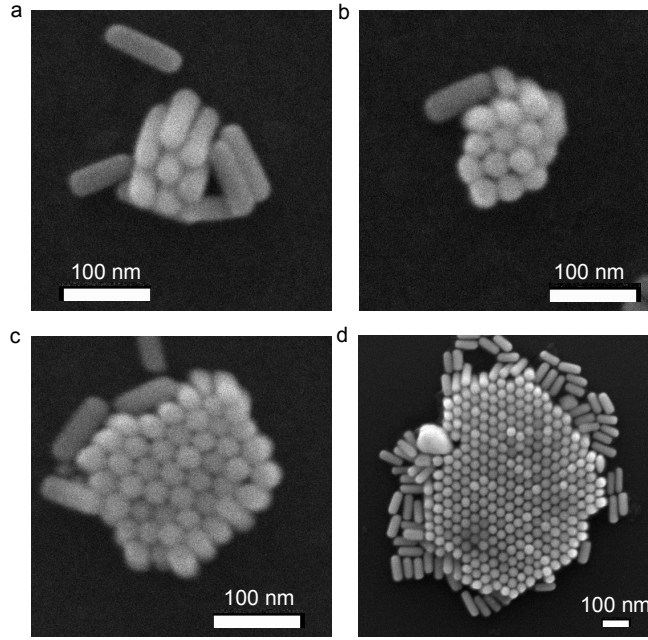

**Supplementary Figure S2** SEM images of the nucleation and growth process of the self-assemblies: (a, b) the hexagonal initial nucleus model drops on the substrate, (c, d) the growing aligned Au nanorod monolayer.

### Supplementary S3

Van der Waals potential of two similar parallel rods can be given by<sup>1</sup>

$$E_{vdw} = -\frac{A l r^{1/2}}{24 h^{3/2}} \quad (1)$$

where  $A$  is the effective Hamaker constant ( $\sim 1 \times 10^{-19}$  J).<sup>2</sup>  $l$  is the length of Au rod.  $r$  is the radii of Au rod.  $h$  is the separation between their surfaces of adjacent Au nanorods. The depletion potential between two parallel Au nanorods can be given by<sup>3</sup>

$$E_{dep} = -\frac{1}{2} l P_0 \left[ -h \sqrt{(2r+m)^3 - h^2} + (2r+m)^2 \arccos\left(\frac{h}{2r+m}\right) \right] \quad (2)$$

where  $m$  is the diameter of CTAB micelles, 5.8 nm.<sup>2</sup>  $P_0 = n_{micelles} R_c T$  is the osmotic pressure generated by the micelles,  $R_c$  is the universal gas constant.  $T$  is the Kelvin degree.  $n_{micelles}$  is the concentration of CTAB micelles,  $n_{micelles} = (c_{CTAB} - c_{CMC}) / N_{agg}$ .  $N_{agg}$  is the aggregation number of CTAB micelles (120, 2.5 mM).<sup>4</sup>  $c_{CTAB}$  is the concentration of CTAB.  $c_{CMC}$  is the critical micelle concentration of CTAB, (0.92 mM).<sup>5</sup>

## References and Notes

1. Bishop, K. J. M.; Wilmer, C. E.; Soh, S.; Grzybowski, B. A., Nanoscale Forces and Their Uses in Self-Assembly. *Small* **2009**, 5, 1600-1630.
2. Young, K. L.; Jones, M. R.; Zhang, J.; Macfarlane, R. J.; Esquivel-Sirvent, R.; Nap, R. J.; Wu, J. S.; Schatz, G. C.; Lee, B.; Mirkin, C. A., Assembly of Reconfigurable One-Dimensional Colloidal Superlattices Due to a Synergy of Fundamental Nanoscale Forces. *Proc. Natl. Acad. Sci. U. S. A.* **2012**, 109, 2240-2245.
3. Xie, Y.; Guo, S.; Ji, Y.; Guo, C.; Liu, X.; Chen, Z.; Wu, X.; Liu, Q., Self-Assembly of Gold Nanorods into Symmetric Superlattices Directed by OH-Terminated Hexa(Ethylene Glycol) Alkanethiol. *Langmuir* **2011**, 27, 11394-11400.
4. Aswal, V. K.; Goyal, P. S., Role of Different Counterions and Size of Micelle in Concentration Dependence Micellar Structure of Ionic Surfactants. *Chem. Phys. Lett.* **2003**, 368, 59-65.
5. Kulys, J.; Vidziunaite, R., The Role of Micelles in Mediator-Assisted Peroxidase Catalysis. *Prog Coll Pol Sci S* **2001**, 116, 137-142.
